# Supplementary material for: Reactivity studies of a corrole germanium hydride complex with aldehydes, olefins and alkyl halides
Source: Royal Society of Chemistry journal article supplement (doi:10.1039/c1cc15076f), 2011-01-01
Supplement: c1cc15076f.pdf [file c1cc15076f.pdf]

## Supporting information for

# Reactivity Studies of Corrole Germanium Hydride Complex with Aldehydes, Olefins and Alkyl halides

Huayi Fang<sup>a</sup>, Zhen Ling<sup>a</sup>, Penelope J. Brothers<sup>b</sup>, and XuefengFu<sup>a\*</sup>

<sup>a</sup>*Beijing National Laboratory for Molecular Sciences, State Key Lab of Rare Earth  
Materials Chemistry and Applications, College of Chemistry and Molecular  
Engineering, Peking University, Beijing, 100871, China.*

<sup>b</sup>*School of Chemical Sciences, The University of Auckland, Private Bag 92019,  
Auckland 1142, New Zealand.*

## General Information

C<sub>6</sub>D<sub>6</sub> and CDCl<sub>3</sub> were purchased from Cambridge Isotope Laboratory Inc; other solvents were distilled before used; aldehydes and olefins were purchased from Aldrich or Alfa Aesar and were distilled before used; and all other chemicals were purchased from Aldrich or Alfa Aesar unless otherwise noted and used as received. <sup>1</sup>H NMR and <sup>19</sup>F NMR spectra were recorded on a Bruker AVII<sup>+</sup>-400 spectrometer at ambient temperature. Mass spectra were taken on a Bruker Apex IV FTMS. UV-Vis spectra were recorded on a SHIMADZU UV-3100 UV-Vis-NIR spectrophotometer. The FTIR microspectroscopy of complex **3** was recorded on a NICOLET iN10 MX spectrometer in the range of 4000-400cm<sup>-1</sup>. The single-crystal X-ray diffraction data was collected on a Rigaku MM007HF Saturn724+ diffractometer.

## General Synthesis method of (TPFC)Ge-OCH<sub>3</sub> and (TPFC)Ge-OCH<sub>2</sub>CH<sub>3</sub> complexes.

The labile axial ligand of (TPFC)Ge-L (L= -OH and -Cl, 10 mg) is easily changed to alkoxy group (-OCH<sub>3</sub>, -OCH<sub>2</sub>CH<sub>3</sub>) by dissolving in alcohol (methanol, ethanol, 10 ml) at room temperature within 30 minutes. (TPFC)Ge-OCH<sub>2</sub>CH<sub>3</sub> is crystallized from ethanol solution to give dark red crystals.

(TPFC)Ge-OCH<sub>3</sub> <sup>1</sup>H NMR (400 MHz, CDCl<sub>3</sub>) δ(ppm): 9.53 (d, 2H, <sup>3</sup>J(H,H)=4.3 Hz; β-pyrrole H), 9.11 (d, 2H, <sup>3</sup>J(H,H)=4.7 Hz; β-pyrrole H), 9.05 (d, 2H, <sup>3</sup>J(H,H)=4.3 Hz; β-pyrrole H), 8.92 (d, 2H, <sup>3</sup>J(H,H)=4.8 Hz; β-pyrrole H), -1.01 (s, 3H; CH<sub>3</sub>); <sup>19</sup>F NMR (376 MHz, C<sub>6</sub>D<sub>6</sub>) δ(ppm): -137.8 (m, 3F; *ortho*-F), -138.8 (dd, 1F, <sup>3</sup>J(F,F)=24.8 Hz, <sup>4</sup>J(F,F)=6.6 Hz; *ortho*-F), -139.0 (dd, 2F, <sup>3</sup>J(F,F)=24.5 Hz, <sup>4</sup>J(F,F)=6.6 Hz; *ortho*-F), -152.2 (t, 1F, <sup>3</sup>J(F,F)=21.2 Hz; *para*-F), -152.4 (t, 2F, <sup>3</sup>J(F,F)=21.8 Hz; *para*-F), -161.8 (m, 3F; *meta*-F), -162.2 (td, 2F, <sup>3</sup>J(F,F)=23.2 Hz, <sup>4</sup>J(F,F)=8.2 Hz; *meta*-F), -162.4 (td, 1F, <sup>3</sup>J(F,F)=22.9 Hz, <sup>4</sup>J(F,F)=8.2 Hz; *meta*-F); UV/Vis (CHCl<sub>3</sub>): λ<sub>max</sub>(nm):

389.0, 411.0, 560.0, 576.5; HRMS (ESI) calcd for  $C_{38}H_{12}F_{15}GeN_4O$   $[M+H]^+$  898.9986; found 898.9997.

(TPFC)Ge-OCH<sub>2</sub>CH<sub>3</sub> <sup>1</sup>H NMR (400 MHz, C<sub>6</sub>D<sub>6</sub>) δ(ppm): 9.14 (d, 2H, <sup>3</sup>J(H,H)=4.4 Hz; β-pyrrole H), 8.89 (d, 2H, <sup>3</sup>J(H,H)=5.0 Hz; β-pyrrole H), 8.71 (d, 2H, <sup>3</sup>J(H,H)=4.4 Hz; β-pyrrole H), 8.69 (d, 2H, <sup>3</sup>J(H,H)=4.6 Hz; β-pyrrole H), -1.01 (q, 2H, <sup>3</sup>J(H,H)=7.0 Hz; CH<sub>2</sub>), -1.69 (t, 3H, <sup>3</sup>J(H,H)=7.0 Hz; CH<sub>3</sub>); UV/Vis (CHCl<sub>3</sub>): λ<sub>max</sub>(nm): 389.5, 411.0, 560.5, 577.0; HRMS (ESI) calcd for  $C_{39}H_{14}F_{15}GeN_4O$   $[M+H]^+$  913.0143; found 913.0145.

### General synthesis method of (TPFC)Ge-H complex.

Methanol (10 μl) is added to a Schlenk flask containing benzene solution (300 μl) of (TPFC)Ge-OCH<sub>3</sub> (1 mg,  $1.1 \times 10^{-3}$  mmol). After the solution is degassed for three freeze-pump-thaw cycles, excess solid NaBH<sub>4</sub> are added into the flask. The yield of the reaction reaches about 95% after 4 hours.

(TPFC)Ge-H (yield: 95%): <sup>1</sup>H NMR (400 MHz, C<sub>6</sub>D<sub>6</sub>) δ(ppm): 9.09 (d, 2H, <sup>3</sup>J(H,H)=4.4 Hz; β-pyrrole H), 8.87 (d, 2H, <sup>3</sup>J(H,H)=4.3 Hz; β-pyrrole H), 8.65 (m, 4H, β-pyrrole H), -2.14 (s, 1H, Ge-H); <sup>19</sup>F NMR (376 MHz, C<sub>6</sub>D<sub>6</sub>) δ(ppm): -139.9 (dd, 2F; <sup>3</sup>J(F,F)=25.4 Hz, <sup>4</sup>J(F,F)=6.2 Hz; *ortho*-F), -140.2 (dd, 1F, <sup>3</sup>J(F,F)=24.8 Hz, <sup>4</sup>J(F,F)=6.7 Hz; *ortho*-F), -140.6 (dd, 1F, <sup>3</sup>J(F,F)=24.9 Hz, <sup>4</sup>J(F,F)=6.8 Hz; *ortho*-F), -140.8 (dd, 2F, <sup>3</sup>J(F,F)=24.6 Hz, <sup>4</sup>J(F,F)=6.1 Hz; *ortho*-F), -154.6 (t, 1F, <sup>3</sup>J(F,F)=21.7 Hz; *para*-F), -154.7 (t, 2F, <sup>3</sup>J(F,F)=21.8 Hz; *para*-F), -163.9 (td, 3F, <sup>3</sup>J(F,F)=23.3 Hz, <sup>4</sup>J(F,F)=7.3 Hz; *meta*-F), -164.3 (td, 2F, <sup>3</sup>J(F,F)=23.4 Hz, <sup>4</sup>J(F,F)=8.1 Hz; *meta*-F), -164.5 (td, 1F, <sup>3</sup>J(F,F)=23.4 Hz, <sup>4</sup>J(F,F)=8.0 Hz; *meta*-F); UV/Vis (CHCl<sub>3</sub>): λ<sub>max</sub>(nm): 399.0, 419.5, 529.0, 567.5, 595.0.

### General procedure of reactions of (TPFC)Ge-H with aldehydes.

Freshly prepared (TPFC)Ge-H (1 mg,  $1.2 \times 10^{-3}$  mmol) is dissolved in 300 μl C<sub>6</sub>D<sub>6</sub> in J. Young Valve NMR tube. Excess aldehydes and catalytic amount of KOH are added into the NMR tube. After the solution is degassed for three freeze-pump-thaw cycles, the NMR tube is heated to 60-70°C in a water-bath for 24-33 hours.

(TPFC)Ge-CH<sub>2</sub>OH (prepared using paraformaldehyde; yield: 91%): <sup>1</sup>H NMR (400 MHz, C<sub>6</sub>D<sub>6</sub>) δ(ppm): 9.12 (d, 2H, <sup>3</sup>J(H,H)=4.3 Hz; β-pyrrole H), 8.88 (d, 2H, <sup>3</sup>J(H,H)=4.6 Hz; β-pyrrole H), 8.68 (d, 2H, <sup>3</sup>J(H,H)=4.1 Hz; β-pyrrole H), 8.66 (d, 2H, <sup>3</sup>J(H,H)=4.7 Hz; β-pyrrole H), -2.20 (d, 2H, <sup>3</sup>J(H,H)=5.3 Hz; CH<sub>2</sub>), -3.72 (t, 1H, <sup>3</sup>J(H,H)=5.5 Hz; OH); <sup>19</sup>F NMR (376 MHz, C<sub>6</sub>D<sub>6</sub>) δ(ppm): -140.3 (dd, 2F; <sup>3</sup>J(F,F)=24.9 Hz, <sup>4</sup>J(F,F)=5.8 Hz; *ortho*-F), -140.6 (td, 2F, <sup>3</sup>J(F,F)=22.8 Hz, <sup>4</sup>J(F,F)=7.0 Hz; *ortho*-F), -140.8 (dd, 2F, <sup>3</sup>J(F,F)=25.6 Hz, <sup>4</sup>J(F,F)=5.7 Hz; *ortho*-F), -154.7 (m, 3F; *para*-F), -164.2 (m, 5F; *meta*-F), -164.4 (td, 1F, <sup>3</sup>J(F,F)=22.9 Hz, <sup>4</sup>J(F,F)=7.2 Hz; *meta*-F); UV/Vis (CHCl<sub>3</sub>): λ<sub>max</sub>(nm): 420.0, 530.0, 568.0, 597.0; HRMS (ESI) calcd for  $C_{38}H_{11}F_{15}GeN_4NaO$   $[M+Na]^+$  920.98058; found 920.98179.

(TPFC)Ge-CH(OH)C<sub>6</sub>H<sub>5</sub> (prepared using benzaldehyde; yield: 84%): <sup>1</sup>H NMR (400 MHz, C<sub>6</sub>D<sub>6</sub>) δ(ppm): 9.03 (d, 2H, <sup>3</sup>J(H,H)=4.2 Hz; β-pyrrole H), 9.02 (d, 2H,

$^3J(\text{H,H})=4.3$  Hz;  $\beta$ -pyrrole H), 8.82 (d, 2H,  $^3J(\text{H,H})=5.1$  Hz;  $\beta$ -pyrrole H), 8.61 (d, 2H,  $^3J(\text{H,H})=4.8$  Hz;  $\beta$ -pyrrole H), 6.38 (t, 1H,  $^3J(\text{H,H})=7.2$  Hz;  $\epsilon$ -CH), 6.21 (t, 2H,  $^3J(\text{H,H})=7.6$  Hz;  $\delta$ -CH), 3.80 (d, 2H,  $^3J(\text{H,H})=7.6$  Hz;  $\gamma$ -CH), -1.17 (d, 1H,  $^3J(\text{H,H})=4.0$  Hz; CH), -2.69 (d, 1H,  $^3J(\text{H,H})=4.1$  Hz; OH); HRMS (ESI) calcd for  $\text{C}_{44}\text{H}_{16}\text{F}_{15}\text{GeN}_4\text{O}$   $[\text{M}+\text{H}]^+$  975.03011; found 975.03366.

### General procedure of reactions of (TPFC)Ge-H with olefins.

Freshly prepared (TPFC)Ge-H is dissolved in 300  $\mu\text{l}$   $\text{C}_6\text{D}_6$  in a J. Young Valve NMR tube. Olefin (100 equiv.) and a catalytic amount of KOH are added into the NMR tube. After the solution is degassed for three freeze-pump-thaw cycles, the NMR tube is heated to 60  $^\circ\text{C}$  in a water-bath for 24 hours.

(TPFC)Ge- $\text{CH}_2\text{CH}_2\text{CO}_2\text{CH}_3$  (prepared using methyl acrylate; yield: 95%)  $^1\text{H}$  NMR (400 MHz,  $\text{CDCl}_3$ )  $\delta$ (ppm): 9.44(d, 2H,  $^3J(\text{H,H})=4.3$  Hz;  $\beta$ -pyrrole H), 9.02(d, 2H,  $^3J(\text{H,H})=4.8$  Hz;  $\beta$ -pyrrole H), 8.97(d, 2H,  $^3J(\text{H,H})=4.2$  Hz;  $\beta$ -pyrrole H), 8.82(d, 2H,  $^3J(\text{H,H})=4.8$  Hz;  $\beta$ -pyrrole H), 2.81(s, 3H;  $\text{CH}_3$ ), -2.08(m, 2H;  $\beta$ - $\text{CH}_2$ ), -4.11(m, 2H;  $\alpha$ - $\text{CH}_2$ ).  $^{19}\text{F}$  NMR (376 MHz,  $\text{CDCl}_3$ )  $\delta$ (ppm): -139.4 (m, 3F; *ortho*-F), -139.9 (dd, 1F,  $^3J(\text{F,F})=23.7$  Hz,  $^4J(\text{F,F})=5.9$  Hz; *ortho*-F), -140.0 (dd, 2F,  $^3J(\text{F,F})=23.8$  Hz,  $^4J(\text{F,F})=5.6$  Hz; *ortho*-F), -154.7 (t, 2F,  $^3J(\text{F,F})=21.0$  Hz; *para*-F), -154.9 (t, 1F,  $^3J(\text{F,F})=20.9$  Hz; *para*-F), -164.0 (m, 6F; *meta*-F); UV/Vis ( $\text{CHCl}_3$ ):  $\lambda_{\text{max}}$ (nm): 398.5, 419.5, 528.5, 567.5, 595.5; HRMS (ESI) calcd for  $\text{C}_{41}\text{H}_{16}\text{F}_{15}\text{GeN}_4\text{O}_2$   $[\text{M}+\text{H}]^+$  955.0249; found 955.0278. The (TPFC)Ge- $\text{CH}_2\text{CH}_2\text{CO}_2\text{CH}_3$  was crystallized from petroleum ether/chloroform solution.

(TPFC)Ge- $\text{CH}_2\text{CHDCOOCH}_3$  (yield: 95%)  $^1\text{H}$  NMR (400 MHz,  $\text{CDCl}_3$ )  $\delta$ (ppm): 9.44(d, 2H, 4.3 Hz), 9.02(d, 2H, 4.8 Hz), 8.97(d, 2H, 4.2 Hz), 8.82(d, 2H, 4.8 Hz), 2.81(s, 3H), -2.10(t, 1H, 8.0 Hz), -4.12(d, 2H, 8.8 Hz). The HRMS (ESI) calcd for  $\text{C}_{41}\text{H}_{14}\text{DF}_{15}\text{GeN}_4\text{NaO}_2$   $[\text{M}+\text{Na}]^+$  978.01316; found 978.01470.

(TPFC)Ge- $\text{CH}_2\text{CH}_2\text{CH}_2\text{CH}_2\text{CH}_3$  (prepared using 1-pentene; yield: 50%)  $^1\text{H}$  NMR (400 MHz,  $\text{CDCl}_3$ )  $\delta$ (ppm): 9.41 (d, 2H,  $^3J(\text{H,H})=4.2$  Hz;  $\beta$ -pyrrole H), 9.00 (d, 2H,  $^3J(\text{H,H})=4.8$  Hz;  $\beta$ -pyrrole H), 8.95 (d, 2H,  $^3J(\text{H,H})=4.2$  Hz;  $\beta$ -pyrrole H), 8.80 (d, 2H,  $^3J(\text{H,H})=4.7$  Hz;  $\beta$ -pyrrole H), -0.05 (t, 3H,  $^3J(\text{H,H})=7.3$  Hz;  $\text{CH}_3$ ), -0.20 (m, 2H;  $\delta$ - $\text{CH}_2$ ), -1.17 (m, 2H;  $\gamma$ - $\text{CH}_2$ ), -3.07 (m, 2H;  $\beta$ - $\text{CH}_2$ ), -4.40 (m, 2H;  $\alpha$ - $\text{CH}_2$ );  $^{19}\text{F}$  NMR (376 MHz,  $\text{CDCl}_3$ )  $\delta$ (ppm): -139.8 (m, 6F; *ortho*-F), -155.0 (t, 2F,  $^3J(\text{F,F})=20.8$  Hz; *para*-F), -155.2 (t, 1F,  $^3J(\text{F,F})=20.9$  Hz; *para*-F), -164.2 (m, 6F; *meta*-F); UV/Vis ( $\text{CHCl}_3$ ):  $\lambda_{\text{max}}$ (nm): 400.0, 421.0, 529.5, 568.5, 598.0; HRMS (ESI) calcd for  $\text{C}_{42}\text{H}_{19}\text{F}_{15}\text{GeN}_4$   $\text{M}^+$  938.0586; found 938.0599.

### General method for synthesis of (TPFC)Ge-alkyl complexes using alkyl halides as alkylation reagents.

(TPFC)Ge- $\text{OCH}_3$  (10 mg) is dissolved in 5 mL ethanol in a Schlenk flask. After the solution was degassed for three freeze-pump-thaw cycles, NaOH (20 mg, 0.50 mmol) and  $\text{NaBH}_4$  (20 mg, 0.54 mmol) are injected into the flask. The solution is vigorously stirred at room temperature for 30 min, and then excess alkyl halide (> 100 equiv.) is injected into the frozen flask followed by a degassing procedure. The (TPFC)Ge-alkyl

complex is obtained by chromatography on silica gel using CHCl<sub>3</sub>/petroleum ether (1:3) as eluent.

(TPFC)Ge-CH<sub>3</sub> (prepared using CH<sub>3</sub>I; yield: 90%; crystallized from acetone/H<sub>2</sub>O solution) <sup>1</sup>H NMR (400 MHz, C<sub>6</sub>D<sub>6</sub>) δ(ppm): 9.11 (d, 2H, <sup>3</sup>J(H,H)=4.3 Hz; β-pyrroleH), 8.87(d, 2H, <sup>3</sup>J(H,H)=5.5 Hz; β-pyrrole H), 8.67(d, 2H, <sup>3</sup>J(H,H)=4.3 Hz; β-pyrrole H), 8.65(d, 2H, <sup>3</sup>J(H,H)=4.7 Hz; β-pyrrole H), -5.13(s, 3H; CH<sub>3</sub>); <sup>19</sup>F NMR (376 MHz, CDCl<sub>3</sub>) δ(ppm): -139.7 (dd, 2F, <sup>3</sup>J(F,F)=24.4 Hz, <sup>4</sup>J(F,F)=5.6 Hz; *ortho*-F), -139.8 (dd, 2F, <sup>3</sup>J(F,F)=24.3 Hz, <sup>4</sup>J(F,F)=6.4 Hz; *ortho*-F), -139.9 (dd, 2F, <sup>3</sup>J(F,F)=23.9 Hz, <sup>4</sup>J(F,F)=5.4 Hz; *ortho*-F), -154.9 (t, 2F, <sup>3</sup>J(F,F)=20.8 Hz; *para*-F), -155.1 (t, 1F, <sup>3</sup>J(F,F)=20.8 Hz; *para*-F), -164.2 (m, 6F; *meta*-F); UV/Vis (CHCl<sub>3</sub>): λ<sub>max</sub>(nm): 398.0, 419.5, 529.0, 568.0, 595.5; HRMS (ESI) calcd for C<sub>38</sub>H<sub>11</sub>F<sub>15</sub>GeN<sub>4</sub> M<sup>+</sup>881.9959; found 881.9974.

(TPFC)Ge-CH<sub>2</sub>C<sub>6</sub>H<sub>5</sub> (prepared using C<sub>6</sub>H<sub>5</sub>Br; yield: 50%) <sup>1</sup>H NMR (400 MHz, CDCl<sub>3</sub>) δ(ppm): 9.31(d, 2H, <sup>3</sup>J(H,H)=4.3 Hz; β-pyrrole H), 8.98(d, 2H, <sup>3</sup>J(H,H)=4.7 Hz; β-pyrrole H), 8.91(d, 2H, <sup>3</sup>J(H,H)=4.2 Hz; β-pyrrole H), 8.77(d, 2H, <sup>3</sup>J(H,H)=4.8; β-pyrrole H), 6.41(t, 1H, <sup>3</sup>J(H,H)=7.3 Hz; ε-CH), 6.16(t, 2H, <sup>3</sup>J(H,H)=7.6 Hz; δ-CH), 3.60(d, 2H, <sup>3</sup>J(H,H)=7.4 Hz; γ-CH), -3.04(s, 2H; CH<sub>2</sub>); <sup>19</sup>F NMR (376 MHz, CDCl<sub>3</sub>) δ(ppm): -139.2 (dd, 1F, <sup>3</sup>J(F,F)=24.3 Hz, <sup>4</sup>J(F,F)=7.3 Hz; *ortho*-F), -139.3 (dd, 2F, <sup>3</sup>J(F,F)=24.7 Hz, <sup>4</sup>J(F,F)=6.4 Hz; *ortho*-F), -139.7 (dd, 1F, <sup>3</sup>J(F,F)=24.6 Hz, <sup>4</sup>J(F,F)=6.6 Hz; *ortho*-F), -139.8 (dd, 2F, <sup>3</sup>J(F,F)=24.5 Hz, <sup>4</sup>J(F,F)=6.0 Hz; *ortho*-F), -154.9 (t, 2F, <sup>3</sup>J(F,F)=20.9 Hz; *para*-F), -155.1 (t, 1F, <sup>3</sup>J(F,F)=20.9 Hz; *para*-F), -164.2 (m, 6F; *meta*-F); UV/Vis (CHCl<sub>3</sub>): λ<sub>max</sub>(nm): 402.5, 423.0, 530.0, 569.5, 599.5; HRMS (ESI) calcd for C<sub>44</sub>H<sub>16</sub>F<sub>15</sub>GeN<sub>4</sub> [M+H]<sup>+</sup> 959.0352; found 959.0370.

### Summary of <sup>1</sup>H NMR data of complexes 1-9.

**Table S1.** <sup>1</sup>H NMR parameters for the organic substituents in alkyl germanium corrolates

| compd. no. | structure of substituent                                         | solvent                       | organic group <sup>1</sup> H NMR parameters                                                                                                                       |
|------------|------------------------------------------------------------------|-------------------------------|-------------------------------------------------------------------------------------------------------------------------------------------------------------------|
| 1          | -OCH <sub>3</sub>                                                | CDCl <sub>3</sub>             | CH <sub>3</sub> , s, -1.01                                                                                                                                        |
| 2          | -OCH <sub>2</sub> CH <sub>3</sub>                                | C <sub>6</sub> D <sub>6</sub> | CH <sub>2</sub> , q, -1.01, <i>J</i> =7.0; CH <sub>3</sub> , t, -1.69, <i>J</i> =7.0                                                                              |
| 3          | -H                                                               | C <sub>6</sub> D <sub>6</sub> | Ge-H, s, -2.14                                                                                                                                                    |
| 4          | -CH <sub>2</sub> OH                                              | C <sub>6</sub> D <sub>6</sub> | OH, t, -3.72, <i>J</i> =5.5; CH <sub>2</sub> , d, -2.20, <i>J</i> =5.3                                                                                            |
| 5          | -CH(OH)C <sub>6</sub> H <sub>5</sub>                             | C <sub>6</sub> D <sub>6</sub> | OH, d, -2.69, <i>J</i> =4.1; CH, d, -1.17, <i>J</i> =4.0; γ-CH, d, 3.80, <i>J</i> =7.6; δ-CH, t, 6.21, <i>J</i> =7.6; ε-CH, t, 6.38, <i>J</i> =7.2                |
| 6          | -CH <sub>2</sub> CH <sub>2</sub> CO <sub>2</sub> CH <sub>3</sub> | CDCl <sub>3</sub>             | α-CH <sub>2</sub> , m, -4.11; β-CH <sub>2</sub> , m, -2.08; CH <sub>3</sub> , s, 2.81                                                                             |
| 7          | -CH <sub>2</sub> (CH <sub>2</sub> ) <sub>3</sub> CH <sub>3</sub> | CDCl <sub>3</sub>             | α-CH <sub>2</sub> , m, -4.40; β-CH <sub>2</sub> , m, -3.07; γ-CH <sub>2</sub> , m, -1.17; δ-CH <sub>2</sub> , m, -0.20; CH <sub>3</sub> , t, -0.05, <i>J</i> =7.3 |
| 8          | -CH <sub>3</sub>                                                 | C <sub>6</sub> D <sub>6</sub> | CH <sub>3</sub> , s, -5.13                                                                                                                                        |
| 9          | -CH <sub>2</sub> C <sub>6</sub> H <sub>5</sub>                   | CDCl <sub>3</sub>             | CH <sub>2</sub> , s, -3.04; γ-CH, d, 3.60, <i>J</i> =7.4; δ-CH, t, 6.16, <i>J</i> =7.6; ε-CH, t, 6.41, <i>J</i> =7.3                                              |

### The molecular structure of complex 2.

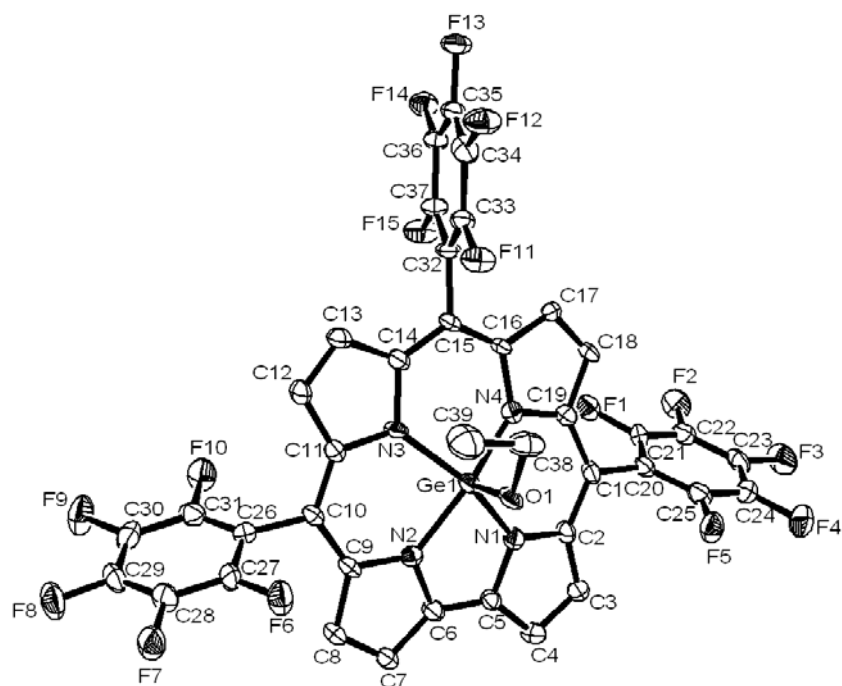

Fig. S1 The structure of complex 2.

### Calculation of $\Delta H$ and $\Delta S$ of eq. 2.

A mixture of (TPFC)Ge-CH<sub>2</sub>OH, (TPFC)Ge-CH<sub>2</sub>OCH<sub>2</sub>OH and paraformaldehyde is prepared using the method mentioned above. <sup>1</sup>H NMR spectra are recorded at 40 °C, 50°C, 60°C and 70°C. Equilibrium constants at different temperatures are derived from the ratios of the integrated intensity for the doublet at  $\delta = 9.12$  ppm (corresponds to the  $\beta$ -pyrrole H of (TPFC)Ge-CH<sub>2</sub>OH), the doublet at  $\delta = 9.13$  ppm (corresponds to the  $\beta$ -pyrrole H of (TPFC)Ge-CH<sub>2</sub>OCH<sub>2</sub>OH) and the singlet ranging from  $\delta = 8.75 \sim 8.84$  ppm (corresponds to the H of formaldehyde). The linear fit line gives changes of  $\Delta H$  and  $\Delta S$  of reaction (TPFC)Ge-CH<sub>2</sub>OH + HCHO  $\rightleftharpoons$  (TPFC)Ge-CH<sub>2</sub>OCH<sub>2</sub>OH (Fig. S2).

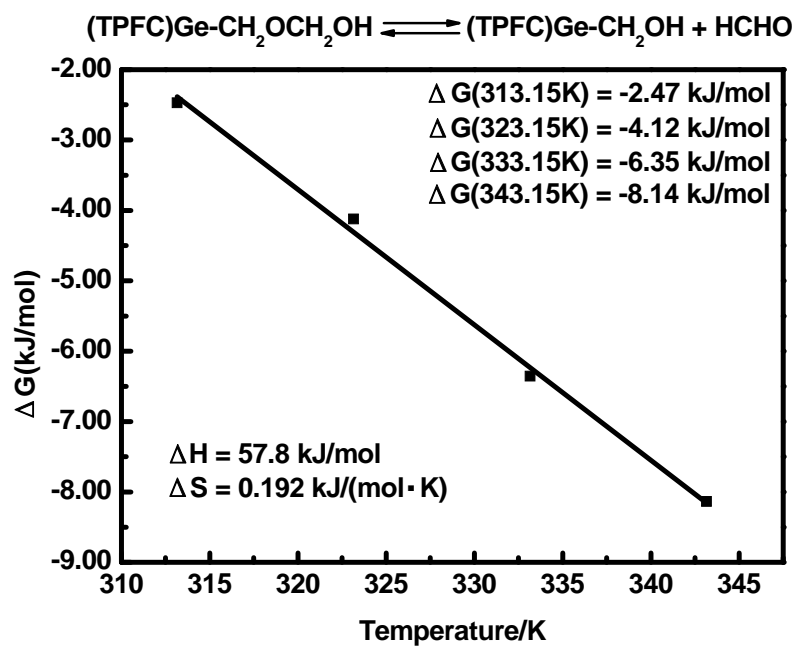

Fig. S2 Temperature dependence of  $\Delta G$  for eq. 2 ( $r^2=0.996$ ).
